# Supplementary material
Source: PubMed Central journal article supplement (PMC10548837)
Supplement: NIHMS1926577-supplement-Supplemental_Material.pdf [file NIHMS1926577-supplement-Supplemental_Material.pdf]

# Supplemental Material for “Kinetic relaxation of giant vesicles validates diffusional softening in a binary lipid mixture”

Kayla Sapp,<sup>1</sup> Mina Aleksanyan,<sup>2,3</sup> Kaitlyn Kerr,<sup>1</sup> Rumiana Dimova,<sup>2</sup> and Alexander Sodt<sup>1</sup>

<sup>1</sup>*Eunice Kennedy Shriver National Institute of Child Health and Human Development, National Institutes of Health, Bethesda, Maryland*

<sup>2</sup>*Max Planck Institute of Colloids and Interfaces, 14476 Potsdam, Germany*

<sup>3</sup>*Institute for Chemistry and Biochemistry, Freie Universität Berlin, 14195 Berlin, Germany*

## A. Experimental Fluctuations

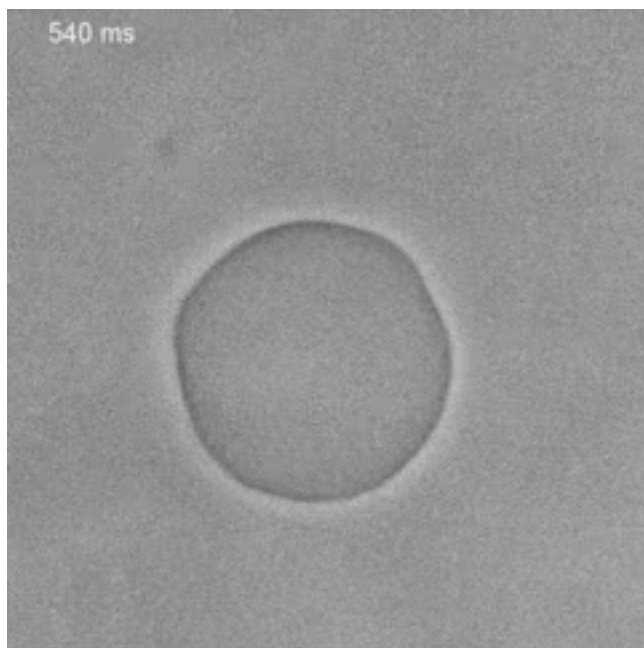

FIG. S1: A slowed-down video of a fluctuating POPC vesicle containing 40 mol% DOPE (same vesicle as in Figure 1 in the main text). The vesicle was prepared in 20 mM sucrose, 4-fold diluted in 22 mM glucose, and additionally deflated by leaving the observation chamber open for 5 minutes. The sequence shows phase contrast images acquired at 100 frames per second and displayed at 25 frames per second (processing was done with Fiji). The approximate duration is roughly 4 seconds in real time (time stamps shown in the upper left corner). (DOI: 10.6084/m9.figshare.21224636)

## B. Sensitivity to fit choices

Figure S2 shows the modest variation in apparent spontaneous curvature difference with  $q_{\max}$ .

Figure S3 shows the variation in the apparent spontaneous curvature difference with  $t_{\max}$ . The fit parameters

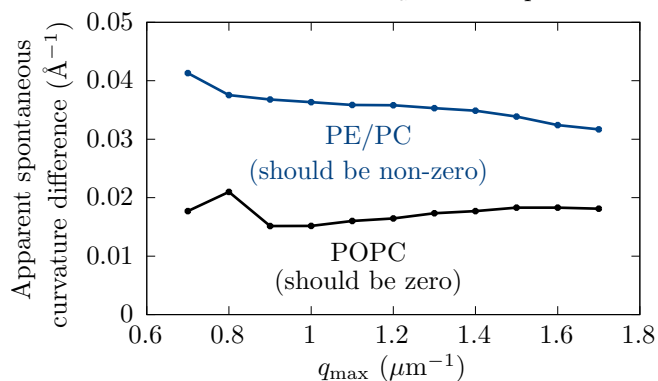

FIG. S2: Variation in the apparent spontaneous curvature difference with  $q_{\max}$ .

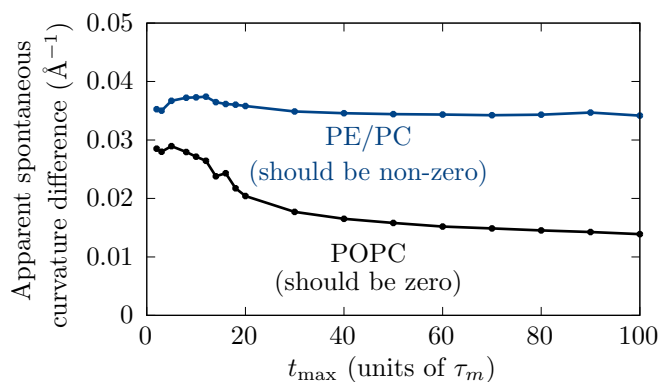

FIG. S3: Variation in the apparent spontaneous curvature difference with  $t_{\max}$ .

converge only when the time-domain is extended well beyond that of the membrane relaxation.

## I. COMPLETE SET OF FIT HISTOGRAMS

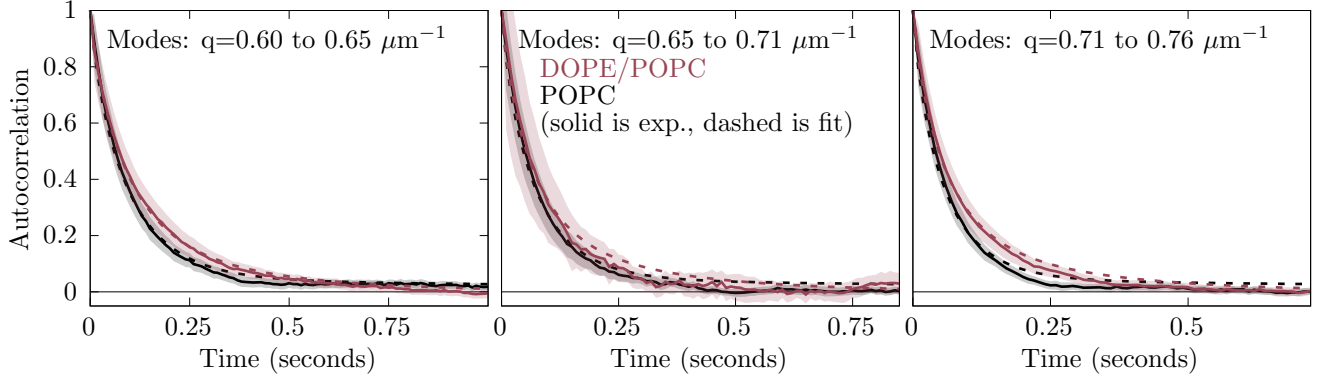

FIG. S4: The average of the autocorrelation  $\langle \nu_q(t)\nu_q(0) \rangle$  over similar modes for the experiment (solid) and fits (dashed). POPC is colored in black. PE/PC is colored red. Filled curves indicate two standard errors obtained by averaging over similar modes.

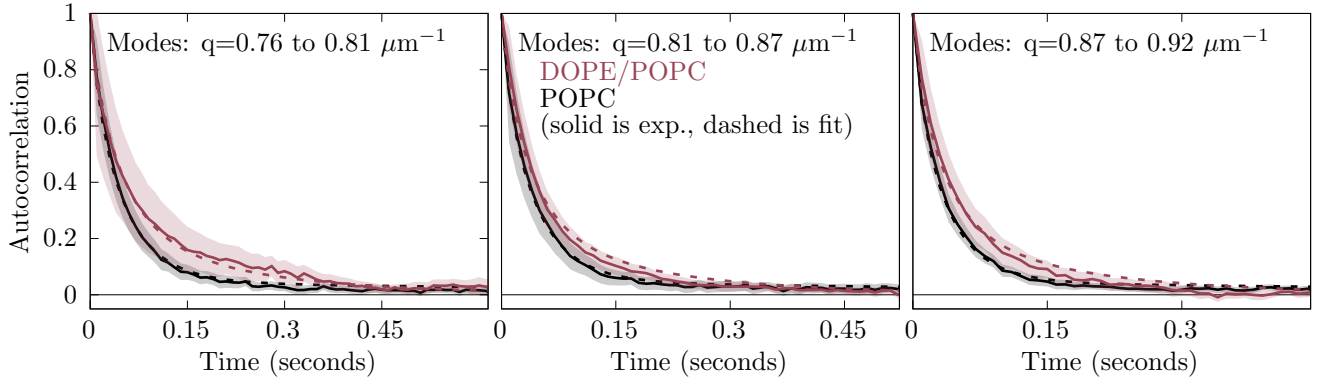

FIG. S5: The average of the autocorrelation  $\langle \nu_q(t)\nu_q(0) \rangle$  over similar modes for the experiment (solid) and fits (dashed). POPC is colored in black. PE/PC is colored red. Filled curves indicate two standard errors obtained by averaging over similar modes.

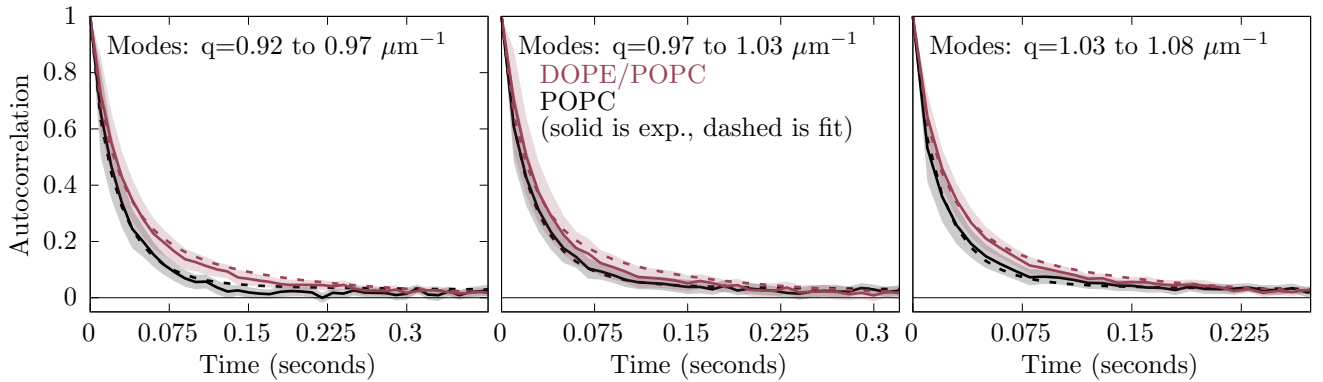

FIG. S6: The average of the autocorrelation  $\langle \nu_q(t)\nu_q(0) \rangle$  over similar modes for the experiment (solid) and fits (dashed). POPC is colored in black. PE/PC is colored red. Filled curves indicate two standard errors obtained by averaging over similar modes.

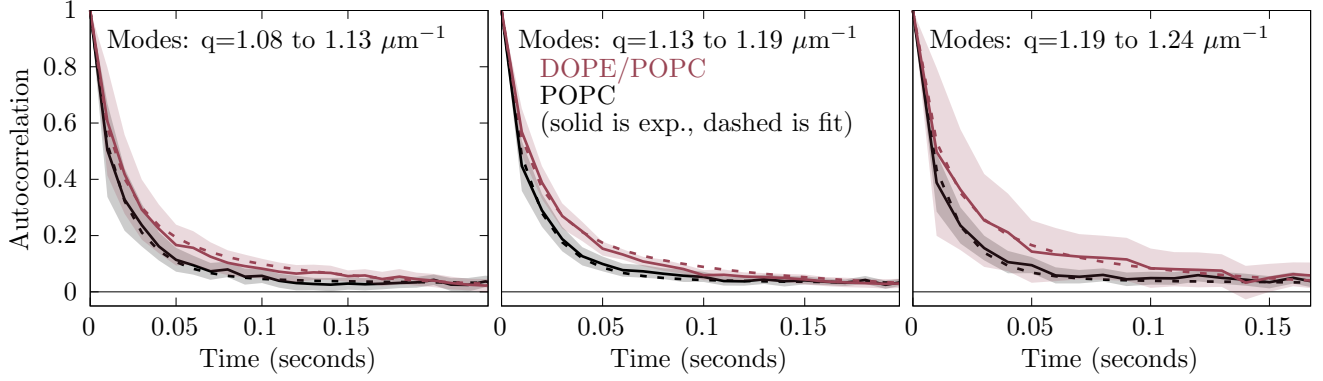

FIG. S7: The average of the autocorrelation  $\langle \nu_q(t)\nu_q(0) \rangle$  over similar modes for the experiment (solid) and fits (dashed). POPC is colored in black. PE/PC is colored red. Filled curves indicate two standard errors obtained by averaging over similar modes.

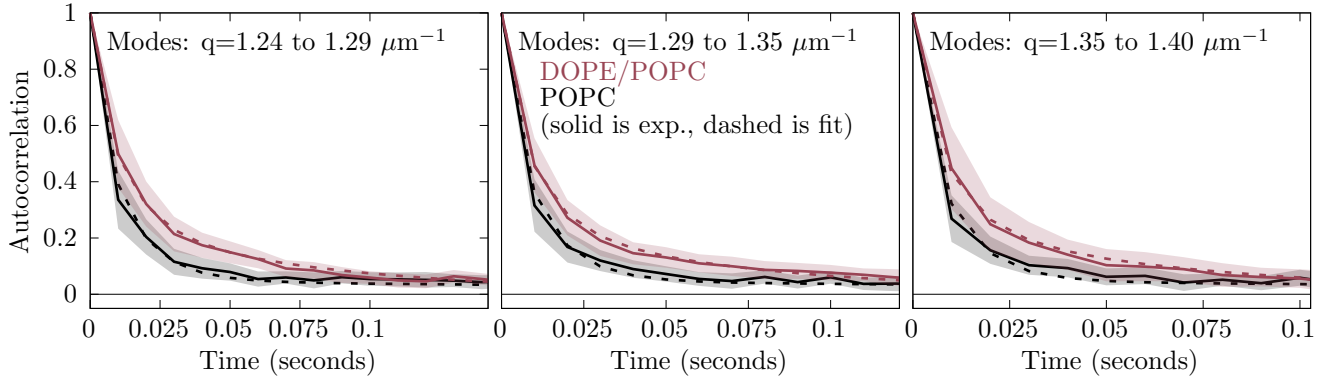

FIG. S8: The average of the autocorrelation  $\langle \nu_q(t)\nu_q(0) \rangle$  over similar modes for the experiment (solid) and fits (dashed). POPC is colored in black. PE/PC is colored red. Filled curves indicate two standard errors obtained by averaging over similar modes.
